# Supplementary material for: Long-Term Prognostic Value of Myocardial Viability by Myocardial Contrast Echocardiography in Patients after Acute Myocardial Infarction: A Systematic Review and Meta-Analysis
Source: MDPI journal article supplement (doi:10.3390/medicina58101429), 2022-10-11
Supplement: s1 [file s1]

**Table S1. Literature search strategy.****A. Literature search strategy for EMBASE**

| #   | Searches                                                                                                                                                                                                             | result  |
|-----|----------------------------------------------------------------------------------------------------------------------------------------------------------------------------------------------------------------------|---------|
| #1  | Contrast Echocardiography.mp. [mp=title, abstract, heading word, drug trade name, original title, device manufacturer, drug manufacturer, device trade name, keyword, floating subheading word, candidate term word] | 5500    |
| #2  | (heart or cardia* or myocardial).mp.                                                                                                                                                                                 | 2594229 |
| #3  | ((heart or cardia* or myocardial) adj3 Infarc*).mp.                                                                                                                                                                  | 419683  |
| #4  | ((heart or cardia* or myocardial) adj3 ischemia).mp.                                                                                                                                                                 | 115513  |
| #5  | event*.mp.                                                                                                                                                                                                           | 1404367 |
| #6  | death.mp.                                                                                                                                                                                                            | 1245477 |
| #7  | Mortality.mp.                                                                                                                                                                                                        | 1461027 |
| #8  | progno*.mp.                                                                                                                                                                                                          | 1128005 |
| #9  | diagno*.mp.                                                                                                                                                                                                          | 6309898 |
| #10 | predict*.mp.                                                                                                                                                                                                         | 2210371 |
| #11 | #8 or #9 or #10                                                                                                                                                                                                      | 8359526 |
| #12 | #5 or #6 or #7                                                                                                                                                                                                       | 3527209 |
| #13 | #1 and #2                                                                                                                                                                                                            | 4836    |
| #14 | #3 or #4                                                                                                                                                                                                             | 494270  |
| #15 | #14 and #13                                                                                                                                                                                                          | 1484    |
| #16 | #11 and #12                                                                                                                                                                                                          | 1223581 |
| #17 | #15 and #16                                                                                                                                                                                                          | 230     |
| #18 | limit 17 to (human and english language)                                                                                                                                                                             | 201     |

mp=title, abstract, heading word, drug trade name, original title, device manufacturer, drug manufacturer, device trade name, keyword, floating subheading word, candidate term word

**B. Literature search strategy for Pubmed**

| #   | Searches                                                                     | Results    |
|-----|------------------------------------------------------------------------------|------------|
| #1  | ((("myocardial infarction"[Mesh]) OR "myocardial ischemia"[Mesh])            | 428,229    |
| #2  | ((("myocardial infarction"[Text Word]) OR "myocardial ischemia"[Text Word])) | 287,401    |
| #3  | #1 OR #2                                                                     | 485,989    |
| #4  | "Contrast Echocardiography"[text word]                                       | 2,853      |
| #5  | "heart"[text word] or "cardia*"[text word] or "myocardial"[text word]        | 1,723,610  |
| #6  | #4 AND #5                                                                    | 2,444      |
| #7  | "event*"[text word] or "Mortality"[text word] or "death"[text word]          | 2,536,683  |
| #8  | "progno*"[text word] or "diagno*"[text word] or "predict*"[text word]        | 6,480,915  |
| #9  | #7 AND #8                                                                    | 854,412    |
| #10 | #3 AND #6 AND #9                                                             | 126        |
| #11 | animals[MeSH Terms]                                                          | 23,237,606 |
| #12 | humans[MeSH Terms]                                                           | 18,561,638 |
| #13 | #11 NOT #12                                                                  | 4,712,846  |
| #14 | #10 NOT #13                                                                  | 121        |

**Figure S1. Predictive Value and Accuracy of MCE in patients after AMI.**

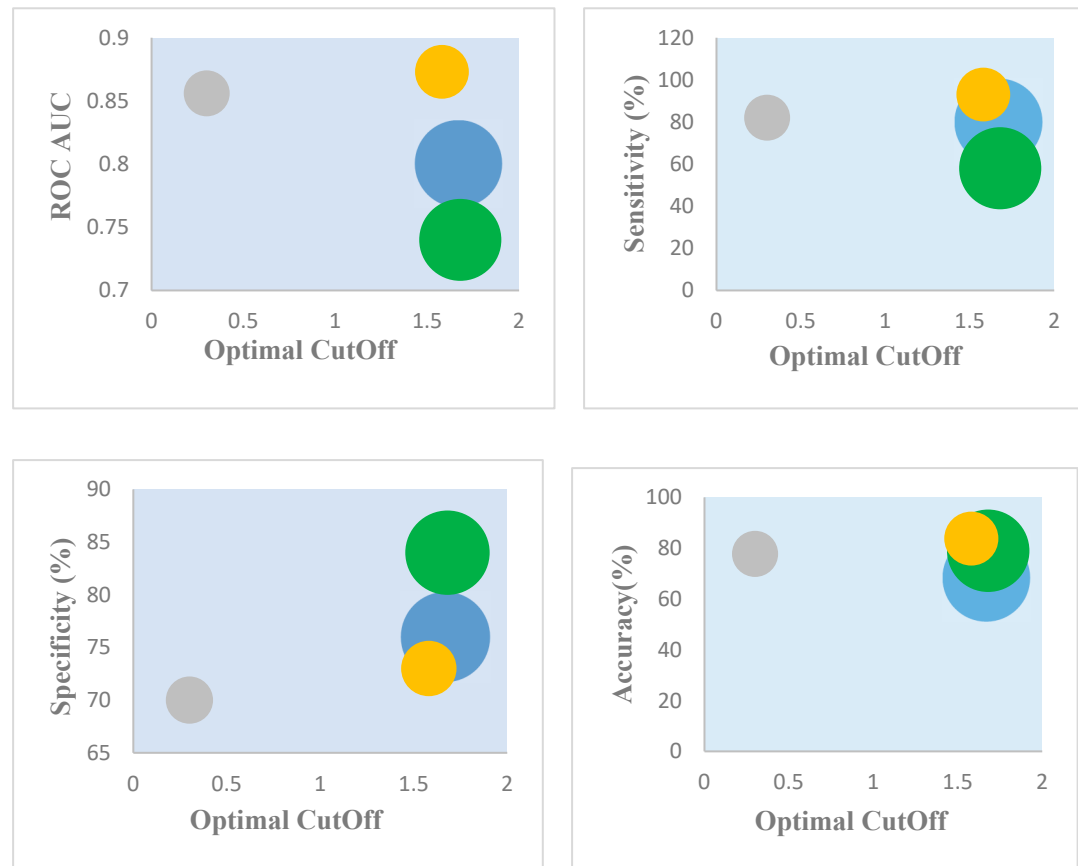

\*The sizes of the bubbles indicate the number of patients. AUC: area under the curve; ROC: receiver-operating characteristic.

| Publication       | semiquantitative scoring system | Optimal CutOff | ROC AUC   | Sensitivity (%) | Specificity (%) | Accuracy(%) |
|-------------------|---------------------------------|----------------|-----------|-----------------|-----------------|-------------|
| Dwivedi et al     | 1/2/3                           | 1.67           | 0.8       | 80              | 76              | 68.4        |
| Olszowska et al   | 1/2/3                           | 1.68           | 0.74      | 58              | 84              | 79          |
| Abdelmoneim et al | 1/2/3                           | 1.58           | 0.873     | 93              | 73              | 83.8        |
| Lenz et al        | <b>0/1/2</b>                    | <b>0.3</b>     | 0.856     | 82              | 70              | 77.8        |
| Pooled parameters | /                               | /              | 0.84      | 0.80            | 0.78            | /           |
| Pooled 95%CI      | /                               | /              | 0.80-0.87 | 0.64-0.90       | 0.69-0.85       | /           |

**Table S2.** Forrest Plots for sensitivity analysis for pooled adjusted RR, performed by using a leave-one-out of the weight of each study.

A.

**1 removal of the study by Abdelmoneim *et al.***

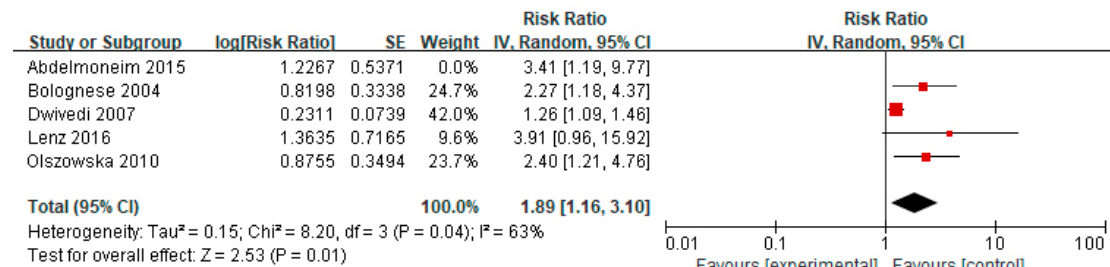

**2 removal of the study by Bolognese *et al.***

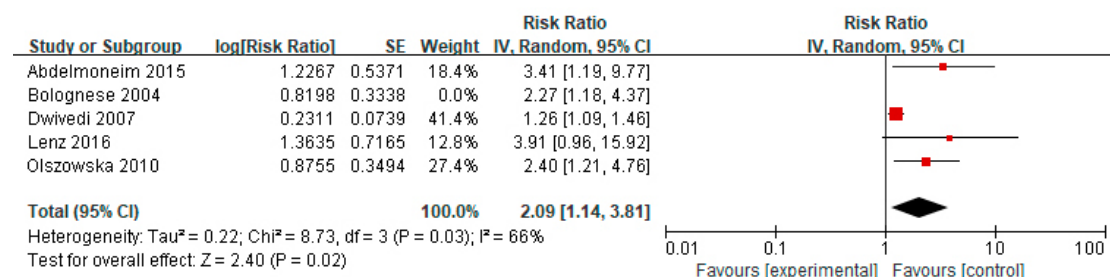

**3 removal of the study by Dwivedi *et al.***

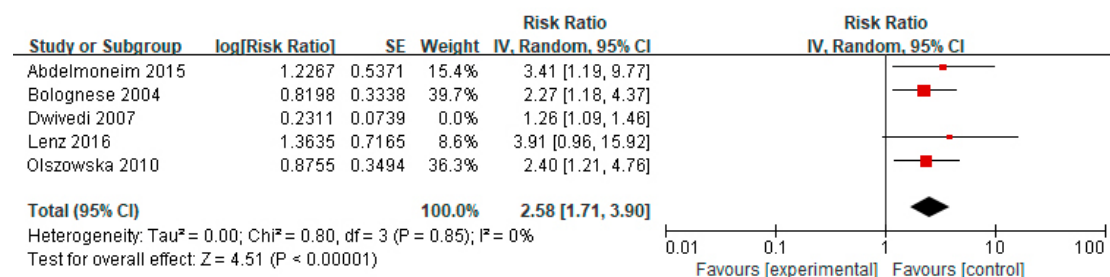

**4 removal of the study by Lenz *et al.***

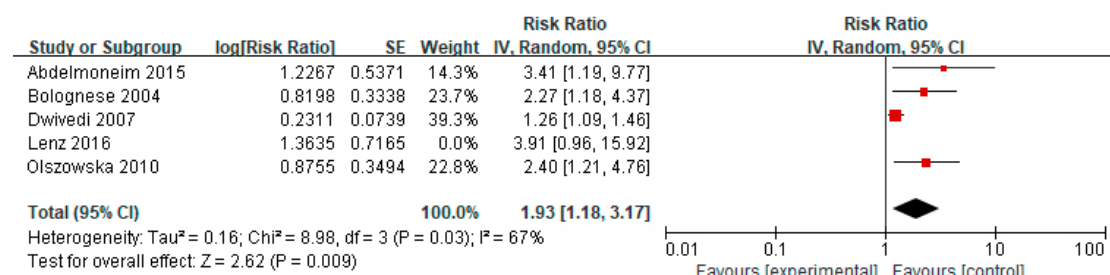

**5 removal of the study by Olszowska *et al.***

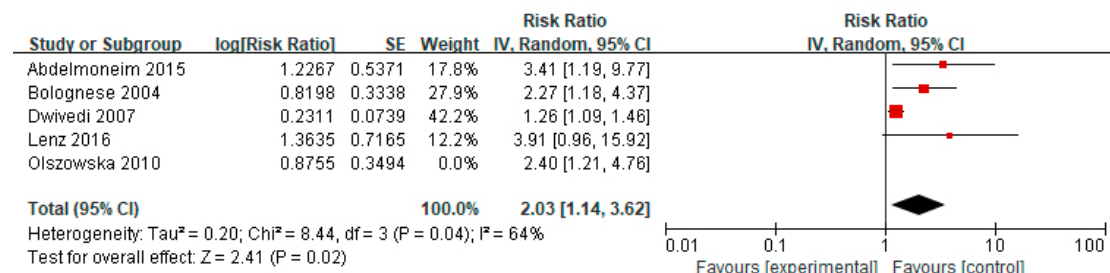

B.

### 1 removal of the study by Bolognese *et al.*

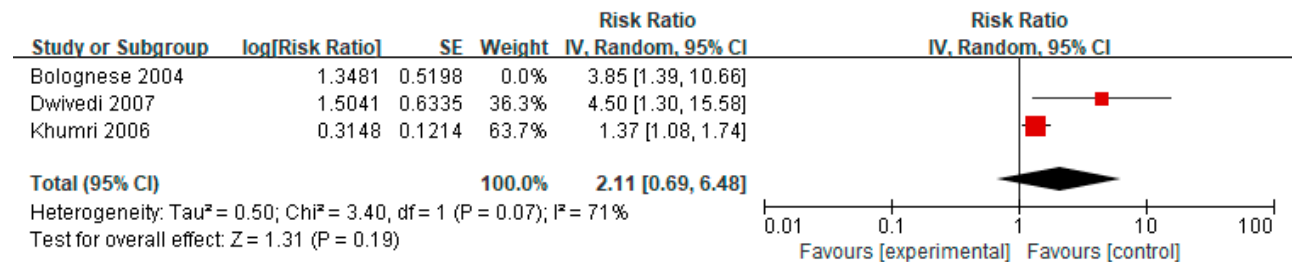

### 2 removal of the study by Dwivedi *et al.*

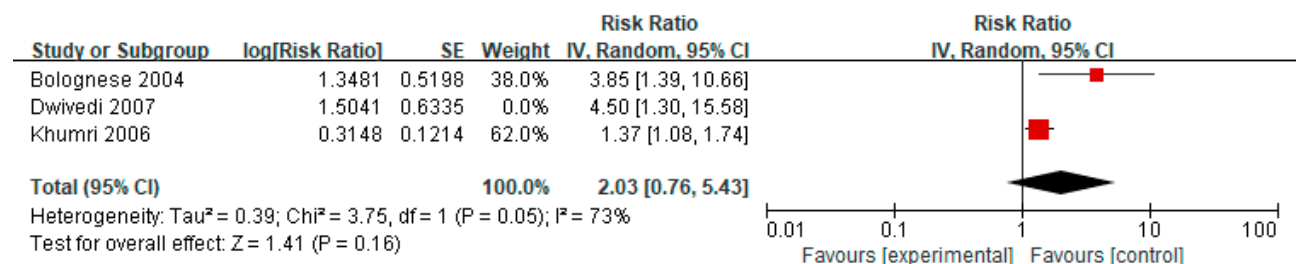

### 3 removal of the study by Khumri *et al.*

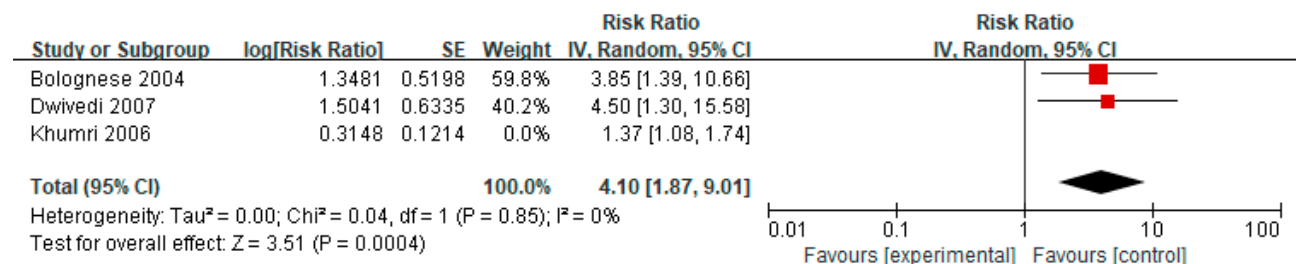

A. total cardiac events and B. hard cardiac events. RR = risk ratio; CI = confidence interval; SE = standard error of the hazard ratio.

**Table S3. Quality Assessment.**

| Study                     | Selection                               |                                               |                              | Comparability                        |                          | Outcome                                             |                              | Quality<br>(Total<br>points) |
|---------------------------|-----------------------------------------|-----------------------------------------------|------------------------------|--------------------------------------|--------------------------|-----------------------------------------------------|------------------------------|------------------------------|
|                           | Representativeness<br>of exposed cohort | Selection of<br>the non-<br>exposed<br>cohort | Ascertainment<br>of exposure | Outcome<br>demonstration<br>at start | Assessment<br>of outcome | Follow-up<br>long enough<br>for outcome<br>to occur | Adequacy<br>of follow-<br>up |                              |
| Bolognese L <i>et al.</i> | 1                                       | 1                                             | 1                            | 1                                    | 2                        | 1                                                   | 1                            | Good(9)                      |
| Khumri TM <i>et al.</i>   | 1                                       | 1                                             | 1                            | 1                                    | 2                        | 1                                                   | 1                            | Good(9)                      |
| Dwivedi <i>et al</i>      | 1                                       | 1                                             | 1                            | 1                                    | 2                        | 1                                                   | 1                            | Good(9)                      |
| Olszowska <i>et al.</i>   | 1                                       | 1                                             | 1                            | 1                                    | 2                        | 0                                                   | 1                            | Good(8)                      |
| Abdelmoneim <i>et al.</i> | 0                                       | 1                                             | 1                            | 1                                    | 2                        | 1                                                   | 0                            | Good(7)                      |
| Lenz <i>et al.</i>        | 0                                       | 1                                             | 1                            | 1                                    | 2                        | 1                                                   | 1                            | Good(8)                      |

A. Newcastle-Ottawa scale for included studies. The Newcastle-Ottawa Scale (NOS) evaluates the quality of included studies based on three parts: selection, comparability and outcome. The full score for each part is 4, 2, 3, respectively, and the maximum total score is 9.

| Study                     | Sonographers<br>blinded to outcome | Prognostic<br>factor defined | appropriate cut-off<br>points | Prognostic factor<br>measurement | Outcome described | adequacy of the analysis |
|---------------------------|------------------------------------|------------------------------|-------------------------------|----------------------------------|-------------------|--------------------------|
| Bolognese L <i>et al.</i> | YES                                | YES                          | NO                            | YES                              | YES               | YES                      |
| Khumri TM <i>et al.</i>   | YES                                | YES                          | NO                            | YES                              | YES               | YES                      |
| Dwivedi <i>et al.</i>     | YES                                | YES                          | YES                           | YES                              | YES               | YES                      |
| Olszowska <i>et al.</i>   | N/A                                | YES                          | YES                           | YES                              | YES               | YES                      |
| Abdelmoneim <i>et al.</i> | YES                                | YES                          | YES                           | YES                              | YES               | YES                      |
| Lenz <i>et al.</i>        | YES                                | YES                          | YES                           | YES                              | YES               | YES                      |

B. Quality data for eligible data sets. N/A = not available
